# Supplementary material for: Reversible trans-to-cis photoisomerization and irreversible photocyclization reactions of a Co-coordinated stilbene derivative on chiral di-β-diketonate lanthanide complexes
Source: Royal Society of Chemistry journal article supplement (doi:10.1039/d2ra07133a), 2023-01-01
Supplement: d2ra07133a1.pdf [file d2ra07133a1.pdf]

*Reversible trans-to-cis* Photoisomerization and Unreversible  
Photocyclization Reactions of a Co-coordinated Stilbene Derivative on  
the Chiral di- $\beta$ -Diketonate Lanthanide Complexes

Ziting Hou<sup>1</sup>, Yanji Huang<sup>1#</sup>, Yushan Ruan<sup>1#</sup>, Han Xu<sup>2</sup>, Yu Tan<sup>1</sup>, Li-Rong Lin<sup>1\*</sup>, Zhen-yi Wu<sup>1</sup>

<sup>1</sup> Department of Chemistry, College of Chemistry and Chemical Engineering, Xiamen University,  
Xiamen, 361005, P. R. China

<sup>2</sup> School of Pharmaceutical Science & Yunnan Key Laboratory of Pharmacology for Natural  
Products, Kunming Medical University, Kunming 650500, P. R. China

Contents

|                                                                                                                                                                                                                                                   |    |
|---------------------------------------------------------------------------------------------------------------------------------------------------------------------------------------------------------------------------------------------------|----|
| Table S1. Selected bond lengths (Å) for complexes <b>1</b> and <b>2</b> .....                                                                                                                                                                     | 3  |
| Table S2. Selected bond lengths (Å) for complexes <b>3</b> and <b>4</b> .....                                                                                                                                                                     | 4  |
| Table S3. Selected angles (deg) of complexes <b>1</b> and <b>2</b> .....                                                                                                                                                                          | 5  |
| Table S4. Selected angles (deg) of complexes <b>3</b> and <b>4</b> .....                                                                                                                                                                          | 6  |
| Table S5. Hydrogen-bonding Geometry (Å and °).....                                                                                                                                                                                                | 7  |
| Figure S1. The polyhedron geometry of center La(III) of complexes <b>1</b> (1a, 1b, left) and <b>2</b> (2a, 2b, right).....                                                                                                                       | 7  |
| Figure S2. The Crystal structure and coordination polyhedron geometry of the two independent molecules of complexes <b>3</b> (3-1, 3-1a in left) and <b>4</b> (4-1, 4-1a in right) in the unit cell.....                                          | 8  |
| Figure S3. Thermogravimetric analysis (TGA) curves of complexes <b>1</b> (black), <b>3</b> (red), <b>4</b> (blue) and <b>5</b> (magenta).....                                                                                                     | 9  |
| Figure S4. ECD spectra of <i>d</i> /l-Hfbc, complexes <b>4</b> , <b>5</b> (a) and complexes <b>3</b> , <b>6</b> (b) in acetonitrile solution, and complexes <b>4</b> , <b>5</b> (c) and <b>3</b> , <b>6</b> (d) in solid state, respectively..... | 9  |
| Figure S5. Observed (red) and calculated (black) X-ray powder diffraction patterns of complexes <b>1</b> (a) and <b>3</b> (b).....                                                                                                                | 10 |
| Figure S6. Cycles of maximum absorption intensity at 319 nm of ligand L in acetonitrile solutions are modulated by the irradiation of UV light at 365 nm for 10 min and 254 nm for 5 min, alternatively.....                                      | 10 |
| Figure S7. Evolution of <sup>1</sup> H-NMR spectra of L in acetonitrile- <i>d</i> <sub>3</sub> solution (after 365 nm light irradiation for 2 h) at 254 nm light with increasing irradiation time.....                                            | 11 |
| Figure S8. Mass spectra of L in methanol solution exposed to 312 nm UV light in different irradiation time.....                                                                                                                                   | 12 |
| Figure S9. The <i>trans-cis</i> photoisomerization and photocyclization reactional kinetics of $\ln(A_\infty - A_0) / (A_\infty - A_t)$ as a function of time for L in acetonitrile solution.....                                                 | 13 |

|                                                                                                                                                                                                                                                                                                                                                                                                                                                                                                                                |    |
|--------------------------------------------------------------------------------------------------------------------------------------------------------------------------------------------------------------------------------------------------------------------------------------------------------------------------------------------------------------------------------------------------------------------------------------------------------------------------------------------------------------------------------|----|
| Figure S10. Cycles of maximum absorption intensity at 324 nm of complex 1 in acetonitrile solution are modulated by the irradiation of UV light at 365 nm for 3 min and 254 nm for 5 min, alternatively.....                                                                                                                                                                                                                                                                                                                   | 14 |
| Figure S11. UV-Vis spectral change of complexes <b>3</b> (a, b), <b>4</b> (e, f), <b>6</b> (h, j) in acetonitrile solutions ( $2.0 \times 10^{-5} \text{ mol} \cdot \text{L}^{-1}$ ) upon irradiation at UV-365 nm and recoverable irradiation at UV-254 nm as a function of time and cycles of maximum absorption intensity at 324 nm are modulated by the irradiation of UV light at 365 nm for 3 min and 254 nm for 5 min, alternatively (c for complex <b>3</b> , g for complex <b>4</b> , k for complex <b>6</b> ). ..... | 15 |
| Figure S12. Evolution of $^1\text{H-NMR}$ spectra of complex <b>1</b> in acetonitrile- $d_3$ solution at 365 nm light with increasing irradiation time. ....                                                                                                                                                                                                                                                                                                                                                                   | 16 |
| Figure S13. Evolution of $^1\text{H-NMR}$ spectra of complex 1 in acetonitrile- $d_3$ solution (after 365 nm light irradiation for 2 h) at 254 nm light with increasing irradiation time. ....                                                                                                                                                                                                                                                                                                                                 | 17 |
| Figure S14. The <i>trans-cis</i> photoisomerization kinetics of $\ln(A_\infty - A_0) / (A_\infty - A_t)$ as a function of time for complexes <b>1</b> (a, b, c), <b>3</b> (d, e, f), <b>4</b> (g, h, i), and <b>6</b> (j, k, l) in acetonitrile solutions. ....                                                                                                                                                                                                                                                                | 18 |
| Table S6. The main structural geometric parameters obtained by the RB3LYP functional method for the optimization of complex <b>3</b> and the crystallographic data measured by single crystal X-ray diffractometer. ....                                                                                                                                                                                                                                                                                                       | 19 |
| Figure S15. HOMO and LUMO energy levels and orbital distributions of complexes <b>3</b> , <b>4</b> and <b>6</b> . ....                                                                                                                                                                                                                                                                                                                                                                                                         | 20 |
| Figure S16. Overlay of calculated and experimental absorption spectra of the complex <b>1</b> in acetonitrile solutions. ....                                                                                                                                                                                                                                                                                                                                                                                                  | 21 |
| Figure S17. The energy levels of the first excited states of ligands <i>trans-L</i> , <i>cis-L</i> , Hfbc and the related energy levels of the $\text{Sm}^{3+}$ , $\text{Eu}^{3+}$ and $\text{Tb}^{3+}$ . ....                                                                                                                                                                                                                                                                                                                 | 22 |
| Figure S18. Cycles of maximum luminescence intensity at 420 nm are modulated by the irradiation of UV light at 365 nm for 2 min and 254 nm for 2 min, alternatively (a for complex <b>3</b> , b for complex <b>4</b> ). ....                                                                                                                                                                                                                                                                                                   | 22 |

**Table S1. Selected bond lengths (Å) for complexes 1 and 2.**

| <b>Complex 1</b>                                                           |                    | <b>Complex 2</b>                                                           |                    |
|----------------------------------------------------------------------------|--------------------|----------------------------------------------------------------------------|--------------------|
| <b>[La(<i>d</i>-fbc)<sub>2</sub>(L)(CF<sub>3</sub>COO)]·H<sub>2</sub>O</b> |                    | <b>[La(<i>l</i>-fbc)<sub>2</sub>(L)(CF<sub>3</sub>COO)]·H<sub>2</sub>O</b> |                    |
| <b>Bond</b>                                                                | <b>lengths (Å)</b> | <b>Bond</b>                                                                | <b>lengths (Å)</b> |
| La1–O1                                                                     | 2.535(3)           | La1–O1                                                                     | 2.547(7)           |
| La1–O2                                                                     | 2.549(3)           | La1–O2                                                                     | 2.525(7)           |
| La1–O3                                                                     | 2.436(3)           | La1–O3                                                                     | 2.449(7)           |
| La1–O4                                                                     | 2.533(3)           | La1–O4                                                                     | 2.503(7)           |
| La1–O5                                                                     | 2.479(3)           | La1–O5                                                                     | 2.498(7)           |
| La1–O6                                                                     | 2.428(3)           | La1–O6                                                                     | 2.445(8)           |
| La1–N1                                                                     | 2.718(4)           | La1–N1                                                                     | 2.684(9)           |
| La1–N2                                                                     | 2.853(4)           | La1–N2                                                                     | 2.841(10)          |
| La1–N3                                                                     | 2.697(3)           | La1–N3                                                                     | 2.730(8)           |
| La2–O9                                                                     | 2.538(3)           | La2–O9                                                                     | 2.533(7)           |
| La2–O10                                                                    | 2.459(3)           | La2–O10                                                                    | 2.445(6)           |
| La2–O11                                                                    | 2.529(3)           | La2–O11                                                                    | 2.545(7)           |
| La2–O12                                                                    | 2.485(3)           | La2–O12                                                                    | 2.480(7)           |
| La2–O13                                                                    | 2.499(3)           | La2–O13                                                                    | 2.531(7)           |
| La2–O14                                                                    | 2.442(3)           | La2–O14                                                                    | 2.421(7)           |
| La2–N5                                                                     | 2.681(4)           | La2–N5                                                                     | 2.733(8)           |
| La2–N6                                                                     | 2.839(4)           | La2–N6                                                                     | 2.845(9)           |
| La2–N7                                                                     | 2.719(4)           | La2–N7                                                                     | 2.711(8)           |

\* O2, O3 and O4, O5 are from the two *d*-fbc, O6 is from trifluoroacetate, O1 and N2 are from benzohydazide and N1, N3 are from pyridines of ligand L.

**Table S2. Selected bond lengths (Å) for complexes 3 and 4.**

| <b>Complex 3</b><br><b>[Sm(<i>d</i>-fbc)<sub>2</sub>(L)(CF<sub>3</sub>COO)]·H<sub>2</sub>O</b> |                    | <b>Complex 4</b><br><b>[Eu(<i>d</i>-fbc)<sub>2</sub>(L)(CF<sub>3</sub>COO)]·H<sub>2</sub>O</b> |                    |
|------------------------------------------------------------------------------------------------|--------------------|------------------------------------------------------------------------------------------------|--------------------|
| <b>Bond</b>                                                                                    | <b>lengths (Å)</b> | <b>Bond</b>                                                                                    | <b>lengths (Å)</b> |
| Sm1–O1                                                                                         | 2.460(6)           | Eu1–O1                                                                                         | 2.448(4)           |
| Sm1–O2                                                                                         | 2.471(6)           | Eu1–O2                                                                                         | 2.461(4)           |
| Sm1–O3                                                                                         | 2.375(6)           | Eu1–O3                                                                                         | 2.358(4)           |
| Sm1–O4                                                                                         | 2.461(6)           | Eu1–O4                                                                                         | 2.444(4)           |
| Sm1–O5                                                                                         | 2.393(6)           | Eu1–O5                                                                                         | 2.386(4)           |
| Sm1–O6                                                                                         | 2.360(6)           | Eu1–O6                                                                                         | 2.344(4)           |
| Sm1–N1                                                                                         | 2.645(8)           | Eu1–N1                                                                                         | 2.609(5)           |
| Sm1–N2                                                                                         | 2.770(9)           | Eu1–N2                                                                                         | 2.772(6)           |
| Sm1–N3                                                                                         | 2.621(8)           | Eu1–N3                                                                                         | 2.626(6)           |
| Sm2–O9                                                                                         | 2.443(7)           | Eu2–O9                                                                                         | 2.446(5)           |
| Sm2–O10                                                                                        | 2.362(7)           | Eu2–O10                                                                                        | 2.364(5)           |
| Sm2–O11                                                                                        | 2.462(7)           | Eu2–O11                                                                                        | 2.430(4)           |
| Sm2–O12                                                                                        | 2.398(7)           | Eu2–O12                                                                                        | 2.398(4)           |
| Sm2–O13                                                                                        | 2.427(7)           | Eu2–O13                                                                                        | 2.414(5)           |
| Sm2–O14                                                                                        | 2.343(7)           | Eu2–O14                                                                                        | 2.346(5)           |
| Sm2–N5                                                                                         | 2.612(8)           | Eu2–N5                                                                                         | 2.625(5)           |
| Sm2–N6                                                                                         | 2.767(11)          | Eu2–N6                                                                                         | 2.751(7)           |
| Sm2–N7                                                                                         | 2.627(8)           | Eu2–N7                                                                                         | 2.589(6)           |

\*\* O2, O3 and O4, O5 are from the two *d*-fbc, O6 is from trifluoroacetate, O1 and N2 are from benzohydazide and N1, N3 are from pyridines of ligand L.

**Table S3. Selected angles (deg) of complexes 1 and 2.**

| <b>Complex 1</b><br><b>[La(<i>d</i>-fbc)<sub>2</sub>(L)(CF<sub>3</sub>COO)]·H<sub>2</sub>O</b><br><b>Angles(Å)</b> |            |             |            | <b>Complex 2</b><br><b>[La(<i>l</i>-fbc)<sub>2</sub>(L)(CF<sub>3</sub>COO)]·H<sub>2</sub>O</b><br><b>Angles(Å)</b> |          |             |          |
|--------------------------------------------------------------------------------------------------------------------|------------|-------------|------------|--------------------------------------------------------------------------------------------------------------------|----------|-------------|----------|
| O2-La1-N2                                                                                                          | 111.78(10) | N7-La2-N6   | 61.08(11)  | O1-La1-N3                                                                                                          | 71.8(2)  | O11-La2-N6  | 112.5(2) |
| O2-La1-N1                                                                                                          | 134.26(10) | O9-La2-N7   | 71.78(10)  | O1-La1-N2                                                                                                          | 60.0(2)  | O11-La2-N5  | 134.4(2) |
| O2-La1-N3                                                                                                          | 72.79(10)  | O9-La2-N6   | 60.11(10)  | O1-La1-N1                                                                                                          | 82.1(3)  | O11-La2-N7  | 72.9(2)  |
| O6-La1-O2                                                                                                          | 74.62(10)  | O9-La2-N5   | 82.42(11)  | O4-La1-N3                                                                                                          | 68.1(3)  | O14-La2-O11 | 74.4(2)  |
| O6-La1-O3                                                                                                          | 95.23(11)  | O13-La2-N7  | 68.50(11)  | O4-La1-O1                                                                                                          | 131.4(2) | O14-La2-O10 | 95.5(3)  |
| O6-La1-N2                                                                                                          | 135.02(10) | O13-La2-O9  | 131.61(10) | O4-La1-O2                                                                                                          | 126.9(3) | O14-La2-N6  | 135.3(2) |
| O6-La1-O4                                                                                                          | 76.14(11)  | O13-La2-O11 | 126.85(11) | O4-La1-N2                                                                                                          | 117.6(3) | O14-La2-O13 | 75.9(2)  |
| O6-La1-O1                                                                                                          | 141.78(11) | O13-La2-N6  | 118.19(11) | O4-La1-N1                                                                                                          | 143.3(2) | O14-La2-O9  | 142.0(2) |
| O6-La1-O5                                                                                                          | 81.55(11)  | O13-La2-N5  | 143.12(10) | O5-La1-N3                                                                                                          | 81.8(2)  | O14-La2-O12 | 81.0(3)  |
| O6-La1-N1                                                                                                          | 144.80(11) | O12-La2-N7  | 82.08(10)  | O5-La1-O1                                                                                                          | 129.0(3) | O14-La2-N5  | 144.7(3) |
| O6-La1-N3                                                                                                          | 81.16(11)  | O12-La2-O9  | 129.34(12) | O5-La1-O4                                                                                                          | 70.5(2)  | O14-La2-N7  | 81.8(3)  |
| O3-La1-O2                                                                                                          | 69.99(9)   | O12-La2-O13 | 70.61(11)  | O5-La1-O2                                                                                                          | 138.9(2) | O10-La2-O11 | 69.7(2)  |
| O3-La1-N2                                                                                                          | 129.38(10) | O12-La2-O11 | 139.01(10) | O5-La1-N2                                                                                                          | 69.0(3)  | O10-La2-N6  | 128.9(2) |
| O3-La1-O4                                                                                                          | 70.19(9)   | O12-La2-N6  | 69.32(11)  | O5-La1-N1                                                                                                          | 76.1(3)  | O10-La2-O13 | 70.5(2)  |
| O3-La1-O1                                                                                                          | 77.54(10)  | O12-La2-N5  | 76.17(11)  | O3-La1-N3                                                                                                          | 81.5(3)  | O10-La2-O9  | 77.4(2)  |
| O3-La1-O5                                                                                                          | 139.98(10) | O10-La2-N7  | 81.32(11)  | O3-La1-O1                                                                                                          | 75.8(2)  | O10-La2-O12 | 140.6(2) |
| O3-La1-N1                                                                                                          | 81.36(11)  | O10-La2-O9  | 75.75(11)  | O3-La1-O4                                                                                                          | 72.3(2)  | O10-La2-N5  | 81.3(3)  |
| O3-La1-N3                                                                                                          | 142.18(10) | O10-La2-O13 | 72.01(10)  | O3-La1-O5                                                                                                          | 142.7(2) | O10-La2-N7  | 141.8(2) |
| O4-La1-O2                                                                                                          | 127.31(10) | O10-La2-O12 | 142.46(10) | O3-La1-O2                                                                                                          | 69.8(2)  | O13-La2-O11 | 126.8(3) |
| O4-La1-N2                                                                                                          | 119.94(10) | O10-La2-O11 | 69.96(9)   | O3-La1-N2                                                                                                          | 128.2(2) | O13-La2-N6  | 119.8(2) |
| O4-La1-O1                                                                                                          | 132.66(9)  | O10-La2-N6  | 128.23(10) | O3-La1-N1                                                                                                          | 140.3(2) | O13-La2-O9  | 132.9(2) |
| O4-La1-N1                                                                                                          | 69.73(11)  | O10-La2-N5  | 140.41(10) | O2-La1-N3                                                                                                          | 137.6(2) | O13-La2-N5  | 69.9(3)  |
| O4-La1-N3                                                                                                          | 142.45(9)  | O11-La2-N7  | 137.19(10) | O2-La1-O1                                                                                                          | 71.3(2)  | O13-La2-N7  | 142.9(2) |
| O1-La1-O2                                                                                                          | 67.60(10)  | O11-La2-O9  | 70.83(11)  | O2-La1-N2                                                                                                          | 114.9(3) | O9-La2-O11  | 68.1(2)  |
| O1-La1-N2                                                                                                          | 59.70(10)  | O11-La2-N6  | 114.34(11) | O2-La1-N1                                                                                                          | 72.0(2)  | O9-La2-N6   | 59.5(2)  |
| O1-La1-N1                                                                                                          | 71.98(10)  | O11-La2-N5  | 71.83(11)  | O6-La1-N3                                                                                                          | 143.0(3) | O9-La2-N5   | 71.9(2)  |
| O1-La1-N3                                                                                                          | 82.41(10)  | O14-La2-N7  | 143.48(11) | O6-La1-O1                                                                                                          | 143.6(3) | O9-La2-N7   | 81.7(2)  |
| O5-La1-O2                                                                                                          | 143.89(10) | O14-La2-O9  | 143.34(11) | O6-La1-O4                                                                                                          | 76.0(3)  | O12-La2-O11 | 143.3(2) |
| O5-La1-N2                                                                                                          | 68.10(10)  | O14-La2-O13 | 76.13(11)  | O6-La1-O5                                                                                                          | 78.2(3)  | O12-La2-N6  | 68.3(2)  |
| O5-La1-O4                                                                                                          | 70.34(10)  | O14-La2-O12 | 77.82(12)  | O6-La1-O3                                                                                                          | 96.0(3)  | O12-La2-O13 | 70.6(2)  |
| O5-La1-O1                                                                                                          | 127.50(11) | O14-La2-O10 | 96.54(12)  | O6-La1-O2                                                                                                          | 72.6(3)  | O12-La2-O9  | 127.6(3) |
| O5-La1-N1                                                                                                          | 79.21(11)  | O14-La2-O11 | 72.86(11)  | O6-La1-N2                                                                                                          | 135.6(3) | O12-La2-N5  | 79.9(2)  |
| O5-La1-N3                                                                                                          | 77.09(10)  | O14-La2-N6  | 134.97(11) | O6-La1-N1                                                                                                          | 82.6(3)  | O12-La2-N7  | 77.0(2)  |
| N1-La1-N2                                                                                                          | 61.52(11)  | O14-La2-N5  | 81.71(12)  | N1-La1-N3                                                                                                          | 122.2(3) | N5-La2-N6   | 61.2(3)  |
| N3-La1-N2                                                                                                          | 60.72(10)  | N5-La2-N7   | 122.49(13) | O1-La1-N3                                                                                                          | 61.4(3)  | N7-La2-N6   | 60.6(2)  |
| N3-La1-N1                                                                                                          | 122.15(12) | N5-La2-N6   | 61.46(11)  | O1-La1-N2                                                                                                          | 71.8(2)  | N7-La2-N5   | 121.8(3) |

**Table S4. Selected angles (deg) of complexes 3 and 4**

| <b>Complex 3</b><br><b>[Sm(<i>d</i>-fbc)<sub>2</sub>(L)(CF<sub>3</sub>COO)]·H<sub>2</sub>O</b> |           |             |          | <b>Complex 4</b><br><b>[Eu(<i>d</i>-fbc)<sub>2</sub>(L)(CF<sub>3</sub>COO)]·H<sub>2</sub>O</b> |            |             |            |
|------------------------------------------------------------------------------------------------|-----------|-------------|----------|------------------------------------------------------------------------------------------------|------------|-------------|------------|
| <b>Angles(Å)</b>                                                                               |           |             |          | <b>Angles(Å)</b>                                                                               |            |             |            |
| O6–Sm1–O3                                                                                      | 95.0(3)   | N7–Sm2–N6   | 62.4(3)  | O1–Eu1–N2                                                                                      | 61.46(15)  | N5–Eu2–N6   | 62.72(18)  |
| O6–Sm1–O2                                                                                      | 73.9(2)   | O9–Sm2–N7   | 72.7(2)  | O1–Eu1–N3                                                                                      | 72.15(16)  | O10–Eu2–N5  | 79.73(17)  |
| O6–Sm1–O5                                                                                      | 80.6(3)   | O9–Sm2–N6   | 62.1(2)  | O1–Eu1–N1                                                                                      | 85.13(15)  | O10–Eu2–O13 | 70.26(15)  |
| O6–Sm1–O1                                                                                      | 141.6(2)  | O9–Sm2–O11  | 70.4(2)  | O6–Eu1–O1                                                                                      | 141.21(16) | O10–Eu2–O11 | 71.93(15)  |
| O6–Sm1–O4                                                                                      | 75.1(2)   | O9–Sm2–N5   | 84.8(3)  | O6–Eu1–O2                                                                                      | 73.74(16)  | O10–Eu2–O9  | 74.50(17)  |
| O6–Sm1–N3                                                                                      | 80.1(2)   | O13–Sm2–N7  | 68.8(3)  | O6–Eu1–N2                                                                                      | 135.32(16) | O10–Eu2–O12 | 142.57(17) |
| O6–Sm1–N2                                                                                      | 135.3(2)  | O13–Sm2–N6  | 119.7(3) | O6–Eu1–O5                                                                                      | 80.69(17)  | O10–Eu2–N7  | 141.36(16) |
| O6–Sm1–N1                                                                                      | 144.3(3)  | O13–Sm2–O9  | 131.2(2) | O6–Eu1–O4                                                                                      | 75.35(16)  | O10–Eu2–N6  | 128.56(16) |
| O3–Sm1–O2                                                                                      | 71.49(19) | O13–Sm2–O11 | 125.7(3) | O6–Eu1–O3                                                                                      | 94.68(17)  | O13–Eu2–N5  | 68.59(18)  |
| O3–Sm1–O5                                                                                      | 141.1(2)  | O13–Sm2–N5  | 142.4(2) | O6–Eu1–N3                                                                                      | 144.15(17) | O13–Eu2–O11 | 125.97(19) |
| O3–Sm1–O1                                                                                      | 76.4(2)   | O11–Sm2–N7  | 138.1(2) | O6–Eu1–N1                                                                                      | 79.71(16)  | O13–Eu2–O9  | 131.03(15) |
| O3–Sm1–O4                                                                                      | 69.0(2)   | O11–Sm2–N6  | 114.1(3) | O2–Eu1–N2                                                                                      | 111.50(16) | O13–Eu2–N7  | 142.01(16) |
| O3–Sm1–N3                                                                                      | 142.4(2)  | O11–Sm2–N5  | 70.4(2)  | O2–Eu1–N3                                                                                      | 134.75(15) | O13–Eu2–N6  | 119.90(17) |
| O3–Sm1–N2                                                                                      | 129.5(2)  | O12–Sm2–N7  | 83.0(2)  | O2–Eu1–N1                                                                                      | 71.00(15)  | O11–Eu2–N5  | 137.95(15) |
| O3–Sm1–N1                                                                                      | 79.8(3)   | O12–Sm2–N6  | 69.0(3)  | O5–Eu1–O1                                                                                      | 129.43(17) | O11–Eu2–O9  | 70.31(16)  |
| O2–Sm1–N3                                                                                      | 71.4(2)   | O12–Sm2–O9  | 131.0(3) | O5–Eu1–O2                                                                                      | 140.67(15) | O11–Eu2–N7  | 70.28(17)  |
| O2–Sm1–N2                                                                                      | 111.8(2)  | O12–Sm2–O13 | 72.2(3)  | O5–Eu1–N2                                                                                      | 68.17(16)  | O11–Eu2–N6  | 113.70(17) |
| O2–Sm1–N1                                                                                      | 134.7(2)  | O12–Sm2–O11 | 137.2(2) | O5–Eu1–O4                                                                                      | 72.20(16)  | O14–Eu2–N5  | 142.63(18) |
| O5–Sm1–O2                                                                                      | 140.7(2)  | O12–Sm2–N5  | 75.2(3)  | O5–Eu1–N3                                                                                      | 82.01(17)  | O14–Eu2–O10 | 95.67(19)  |
| O5–Sm1–O1                                                                                      | 129.0(3)  | O10–Sm2–N7  | 80.3(2)  | O5–Eu1–N1                                                                                      | 75.45(16)  | O14–Eu2–O13 | 74.93(17)  |
| O5–Sm1–O4                                                                                      | 72.5(2)   | O10–Sm2–N6  | 129.0(2) | O4–Eu1–O1                                                                                      | 131.75(14) | O14–Eu2–O11 | 71.97(17)  |
| O5–Sm1–N3                                                                                      | 75.3(2)   | O10–Sm2–O9  | 74.8(2)  | O4–Eu1–O2                                                                                      | 126.93(16) | O14–Eu2–O9  | 142.24(17) |
| O5–Sm1–N2                                                                                      | 68.0(2)   | O10–Sm2–O13 | 70.3(2)  | O4–Eu1–N2                                                                                      | 120.87(16) | O14–Eu2–O12 | 78.45(18)  |
| O5–Sm1–N1                                                                                      | 82.0(2)   | O10–Sm2–O11 | 71.5(2)  | O4–Eu1–N3                                                                                      | 69.52(17)  | O14–Eu2–N7  | 80.2(2)    |
| O1–Sm1–O2                                                                                      | 67.9(2)   | O10–Sm2–O12 | 142.3(2) | O4–Eu1–N1                                                                                      | 141.68(15) | O14–Eu2–N6  | 135.55(17) |
| O1–Sm1–O4                                                                                      | 131.9(2)  | O10–Sm2–N5  | 141.0(2) | O3–Eu1–O1                                                                                      | 76.32(15)  | O9–Eu2–N5   | 72.61(16)  |
| O1–Sm1–N3                                                                                      | 84.7(2)   | N5–Sm2–N7   | 124.9(3) | O3–Eu1–O2                                                                                      | 71.86(14)  | O9–Eu2–N7   | 85.49(18)  |
| O1–Sm1–N2                                                                                      | 61.1(2)   | N5–Sm2–N6   | 62.6(3)  | O3–Eu1–N2                                                                                      | 129.71(15) | O9–Eu2–N6   | 61.99(16)  |
| O1–Sm1–N1                                                                                      | 71.9(2)   | O14–Sm2–N7  | 142.9(3) | O3–Eu1–O5                                                                                      | 140.69(15) | O12–Eu2–N5  | 83.15(16)  |
| O4–Sm1–O2                                                                                      | 126.5(2)  | O14–Sm2–N6  | 135.5(2) | O3–Eu1–O4                                                                                      | 68.90(14)  | O12–Eu2–O13 | 72.55(17)  |
| O4–Sm1–N3                                                                                      | 141.9(2)  | O14–Sm2–O9  | 142.0(2) | O3–Eu1–N3                                                                                      | 79.48(17)  | O12–Eu2–O11 | 137.11(15) |
| O4–Sm1–N2                                                                                      | 121.0(2)  | O14–Sm2–O13 | 75.0(2)  | O3–Eu1–N1                                                                                      | 142.52(15) | O12–Eu2–O9  | 130.75(19) |
| O4–Sm1–N1                                                                                      | 70.0(3)   | O14–Sm2–O11 | 71.6(3)  | N3–Eu1–N2                                                                                      | 63.14(18)  | O12–Eu2–N7  | 74.68(18)  |
| N3–Sm1–N2                                                                                      | 62.1(2)   | O14–Sm2–O12 | 78.4(3)  | N1–Eu1–N2                                                                                      | 62.35(16)  | O12–Eu2–N6  | 68.84(17)  |
| N3–Sm1–N1                                                                                      | 124.7(3)  | O14–Sm2–O10 | 95.3(3)  | N1–Eu1–N3                                                                                      | 125.4(2)   | N7–Eu2–N5   | 125.6(2)   |
| N1–Sm1–N2                                                                                      | 62.7(3)   | O14–Sm2–N5  | 80.7(3)  | O1–Eu1–N2                                                                                      | 61.46(15)  | N7–Eu2–N6   | 63.00(18)  |

**Table S5. Hydrogen-bonding Geometry (Å and °)**

| Compounds | Donor-H···accepter         | D-H  | H···A | D···A     | D-H···A |
|-----------|----------------------------|------|-------|-----------|---------|
| <b>1</b>  | Ow-H···O(7)                | 0.87 | 1.88  | 2.746(5)  | 171.7   |
|           | N(4)-H···Ow <sup>i</sup>   | 0.95 | 2.33  | 2.917(11) | 119.2   |
| <b>2</b>  | Ow-H···O(7)                | 0.87 | 1.92  | 2.767(12) | 165.2   |
|           | N(4)-H···Ow <sup>ii</sup>  | 0.88 | 2.11  | 2.852(13) | 141.4   |
| <b>3</b>  | Ow-H···O(7)                | 0.85 | 1.96  | 2.725(12) | 149.0   |
|           | N(4)-H···Ow <sup>iii</sup> | 0.88 | 2.17  | 2.906(13) | 140.6   |
| <b>4</b>  | Ow-H···O(7)                | 0.87 | 1.91  | 2.731(8)  | 155.9   |
|           | N(4)-H···Ow <sup>iv</sup>  | 0.88 | 2.16  | 2.899(9)  | 140.9   |

Symmetry code: (i) 1/2-X,-1/2+Y,1-Z; (ii) -1/2-X,-1/2+Y,-2-Z; (iii) 1/2-X,-1/2+Y,1-Z; (iv) 3/2-X,-1/2+Y,1-Z

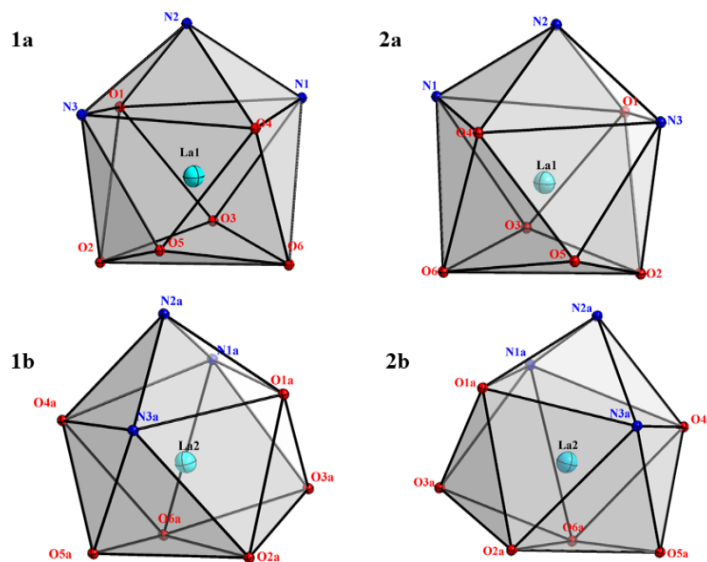

**Figure S1. The polyhedron geometry of center La(III) of complex 1 (1a, 1b, left) and 2 (2a, 2b, right).**

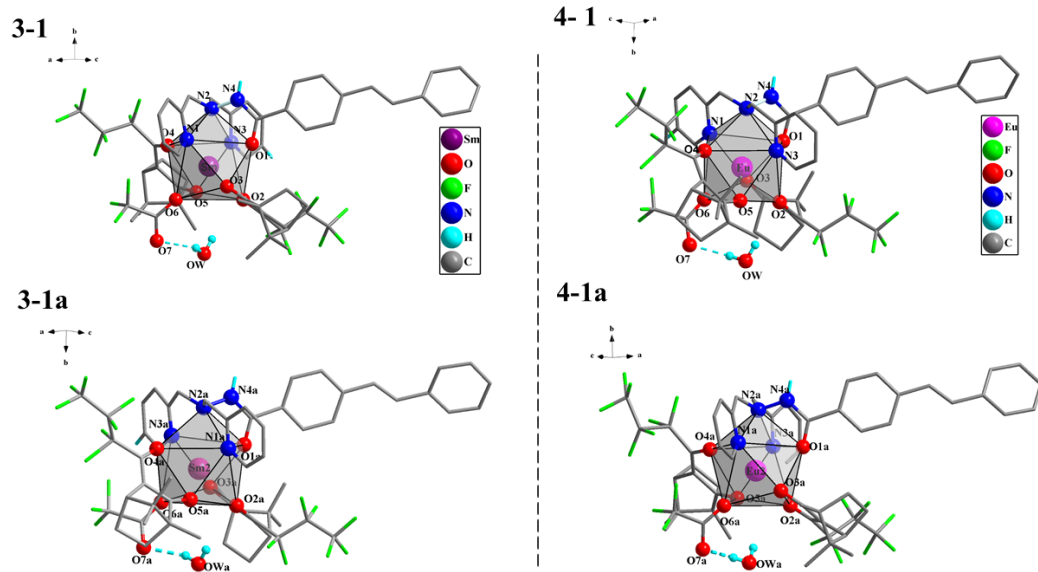

**Figure S2. The Crystal structure and coordination polyhedron geometry of the two independent molecules of complexes 3 (3-1, 3-1a in left) and 4 (4-1, 4-1a in right) in the unit cell.**



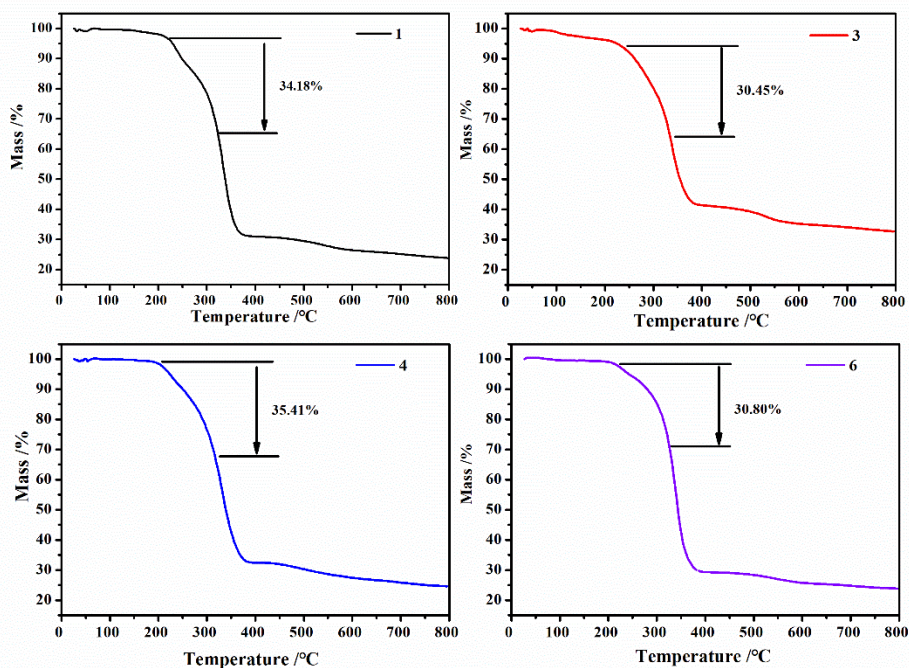

Figure S3. Thermogravimetric analysis (TGA) curves of complexes 1 (black), 3 (red), 4 (blue) and 5 (magenta).

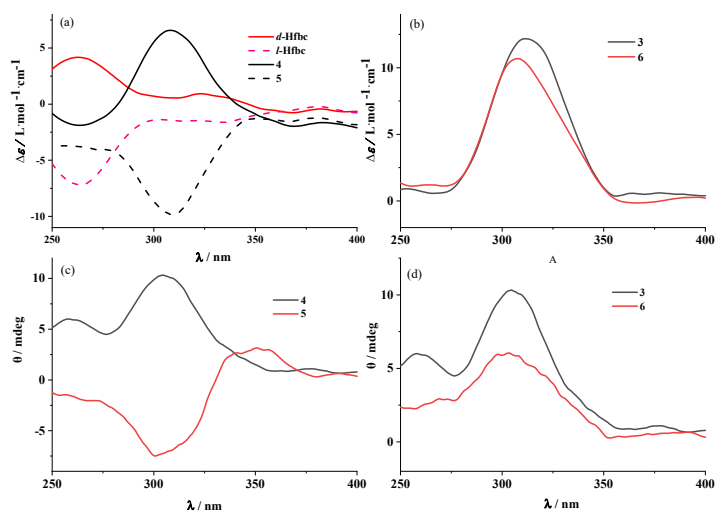

Figure S4. ECD spectra of *d/l*-Hfbc, complexes 4, 5 (a) and complexes 3, 6 (b) in acetonitrile solution, and complexes 4, 5 (c) and 3, 6 (d) in solid state, respectively.

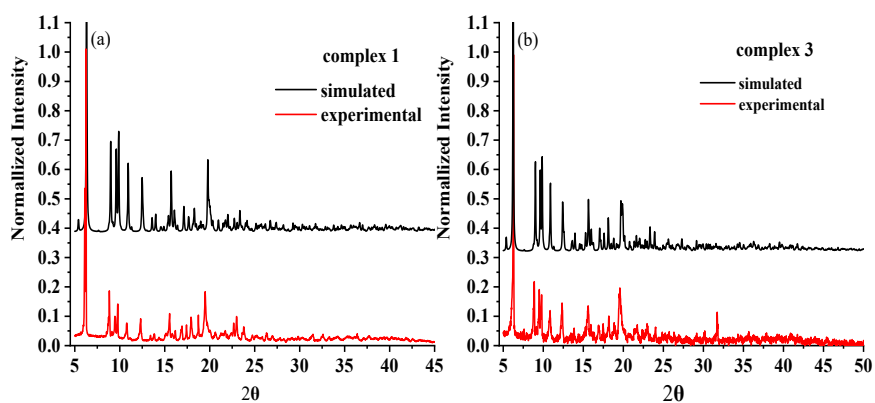

**Figure S5. Observed (Red) and calculated (Black) X-ray powder diffraction patterns of complexes 1 (a) and 3 (b).**

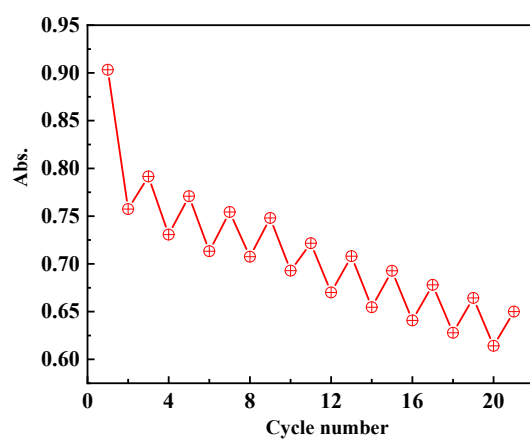

**Figure S6. Cycles of maximum absorption intensity at 319 nm of ligand L in acetonitrile solutions are modulated by the irradiation of UV light at 365 nm for 10 min and 254 nm for 5 min, alternatively.**

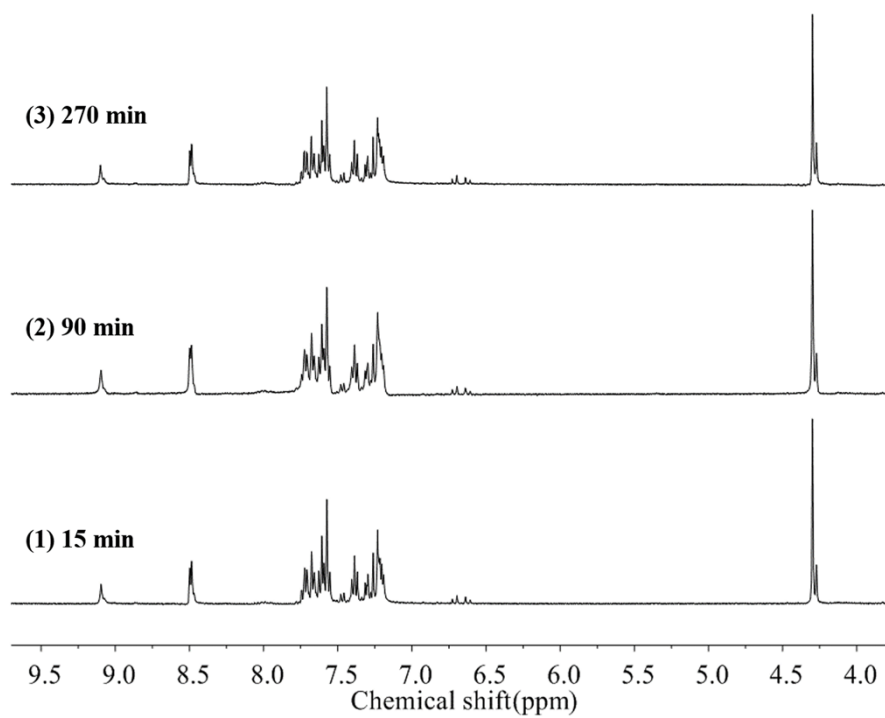

**Figure S7. Evolution of  $^1\text{H-NMR}$  spectra of L in acetonitrile- $d_3$  solution (after 365 nm light irradiation for 2 h) at 254 nm light with increasing irradiation time.**

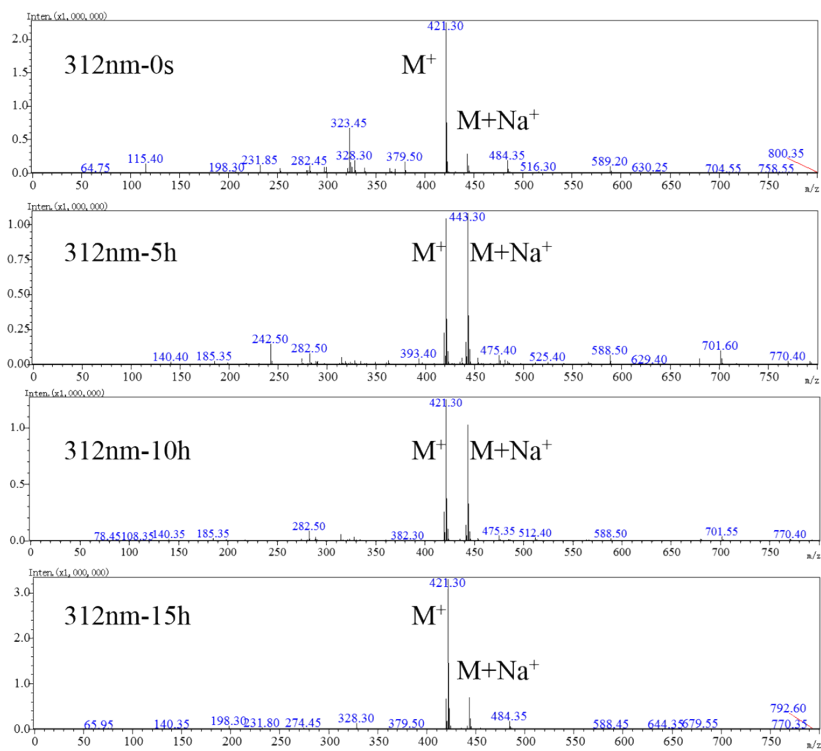

**Figure S8. Mass spectra of L in methanol solution exposed to 312 nm UV light in different irradiation time.**

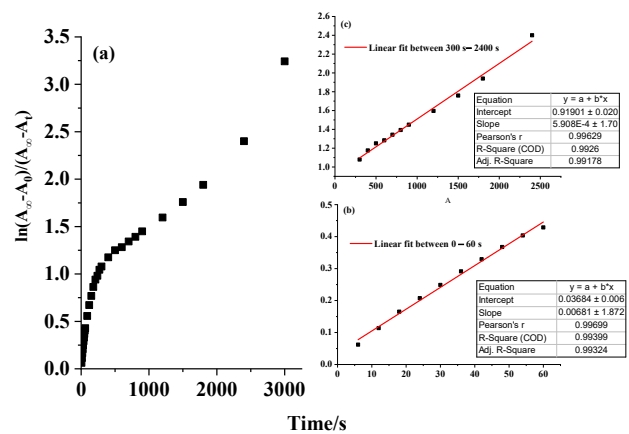

**Figure S9. The *trans* to *cis* photoisomerization and photocyclization reactional kinetics of  $\ln(A_{\infty}-A_0)/(A_{\infty}-A_t)$  as a function of time for L in acetonitrile solution.**

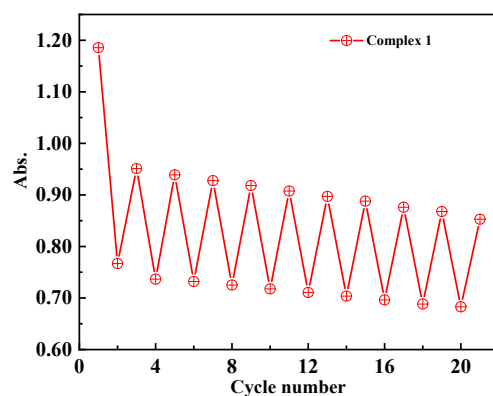

**Figure S10. Cycles of maximum absorption intensity at 324 nm of complex 1 in acetonitrile solution are modulated by the irradiation of UV light at 365 nm for 3 min and 254 nm for 5 min, alternatively.**

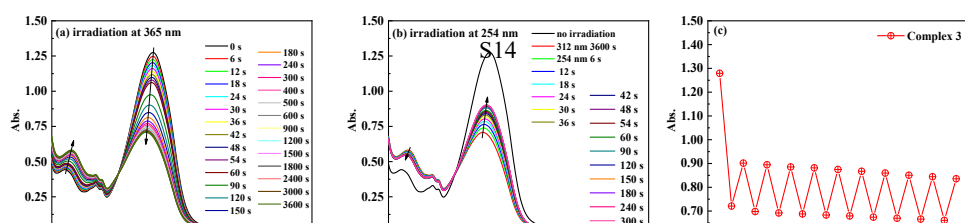

**Figure S11. UV-Vis spectral change of complexes 3 (a, b), 4 (e, f), 6 (h, j) in acetonitrile solutions ( $2.0 \times 10^{-5} \text{ mol} \cdot \text{L}^{-1}$ ) upon irradiation at UV-365 nm and recoverable irradiation at UV-254 nm as a function of time and cycles of maximum absorption intensity at 324 nm are modulated by the irradiation of UV light at 365 nm for 3 min and 254 nm for 5 min, alternatively (c for complex 3, g for complex 4, k for complex 6).**

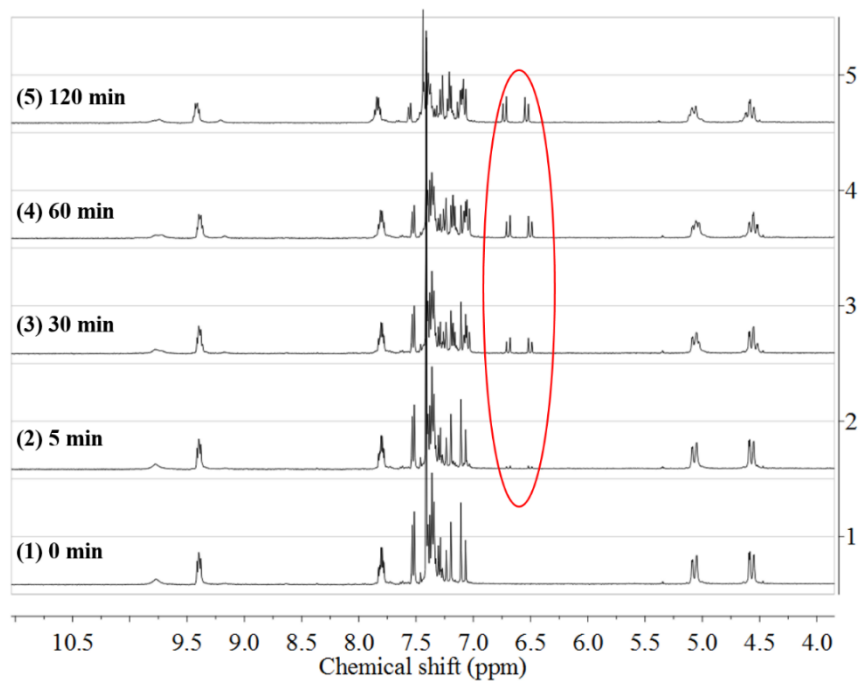

**Figure S12. Evolution of  $^1\text{H-NMR}$  spectra of complex 1 in acetonitrile- $d_3$  solution at 365 nm light with increasing irradiation time.**



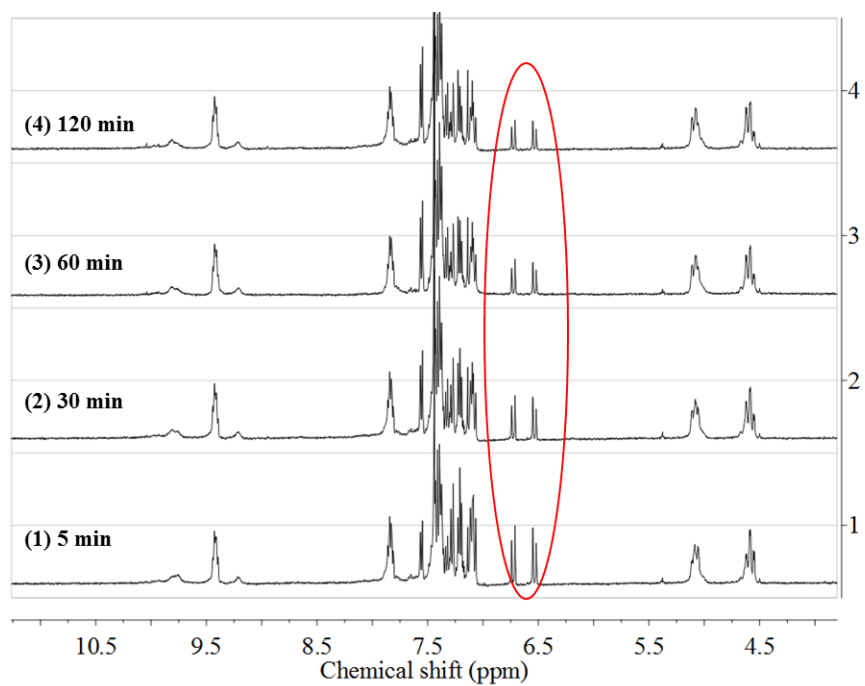

**Figure S13. Evolution of  $^1\text{H-NMR}$  spectra of complex 1 in acetonitrile- $d_3$  solution (after 365 nm light irradiation for 2 h) at 254 nm light with increasing irradiation time.**

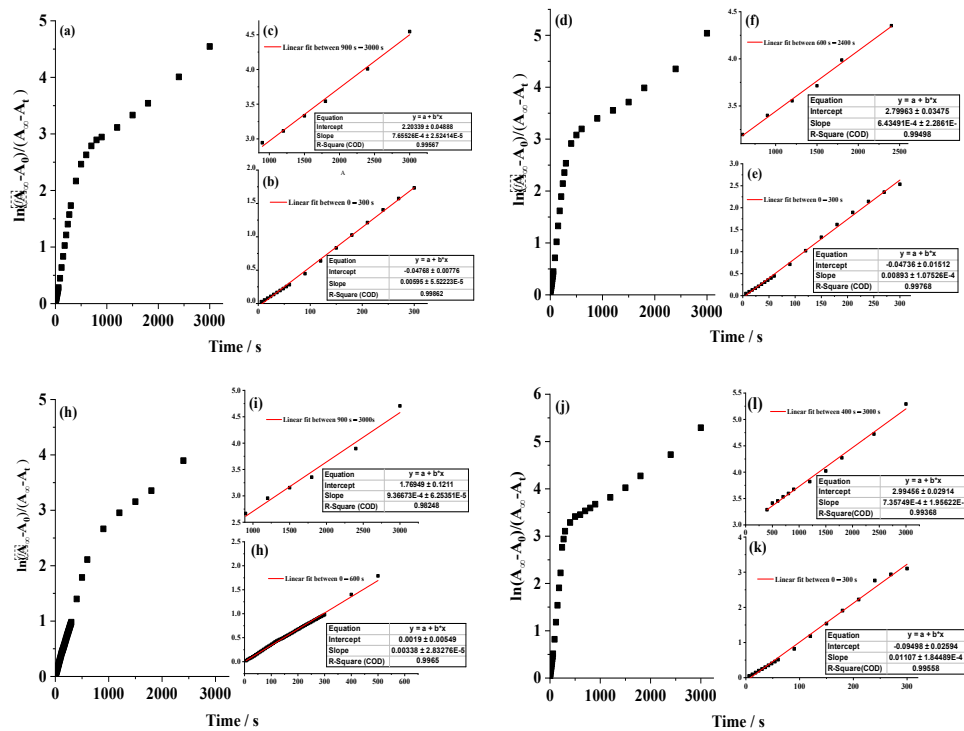

Figure S14. The *trans* to *cis* photoisomerization kinetics of  $\ln(A_{\infty} - A_0)/(A_{\infty} - A_t)$  as a function of time for complexes 1 (a, b, c), 3 (d, e, f), 4 (g, h, i), and 6 (j, k, l) in acetonitrile solutions.

**Table S6. The main structural geometric parameters obtained by the RB3LYP functional method for the optimization of complex 3 and the crystallographic data measured by single crystal X-ray diffractometer.**

| Bond                            | Bond lengths (Å) |        | Bond                                            | Bond angle (°) |        |
|---------------------------------|------------------|--------|-------------------------------------------------|----------------|--------|
|                                 | measured         | RB3LYP |                                                 | measured       | RB3LYP |
| Sm <sub>1</sub> -O <sub>1</sub> | 2.460            | 2.495  | O <sub>2</sub> -Sm <sub>1</sub> -N <sub>2</sub> | 111.8          | 118.6  |
| Sm <sub>1</sub> -O <sub>2</sub> | 2.471            | 2.484  | O <sub>6</sub> -Sm <sub>1</sub> -O <sub>2</sub> | 73.9           | 71.6   |
| Sm <sub>1</sub> -O <sub>3</sub> | 2.375            | 2.353  | O <sub>6</sub> -Sm <sub>1</sub> -O <sub>3</sub> | 95.0           | 105.8  |
| Sm <sub>1</sub> -O <sub>4</sub> | 2.461            | 2.460  | O <sub>6</sub> -Sm <sub>1</sub> -O <sub>4</sub> | 75.1           | 76.9   |
| Sm <sub>1</sub> -O <sub>5</sub> | 2.393            | 2.392  | O <sub>6</sub> -Sm <sub>1</sub> -O <sub>5</sub> | 80.6           | 77.1   |
| Sm <sub>1</sub> -O <sub>6</sub> | 2.360            | 2.348  | O <sub>6</sub> -Sm <sub>1</sub> -N <sub>2</sub> | 135.3          | 128.7  |
| Sm <sub>1</sub> -N <sub>1</sub> | 2.645            | 2.724  | O <sub>2</sub> -Sm <sub>1</sub> -N <sub>1</sub> | 71.4           | 73.8   |
| Sm <sub>1</sub> -N <sub>2</sub> | 2.770            | 2.870  | O <sub>3</sub> -Sm <sub>1</sub> -N <sub>2</sub> | 129.5          | 125.3  |
| Sm <sub>1</sub> -N <sub>3</sub> | 2.621            | 2.728  | O <sub>6</sub> -Sm <sub>1</sub> -N <sub>3</sub> | 144.3          | 147.8  |
| <i>Trans</i> C=C                | 1.310            | 1.351  | N <sub>1</sub> -Sm <sub>1</sub> -N <sub>3</sub> | 124.7          | 121.3  |

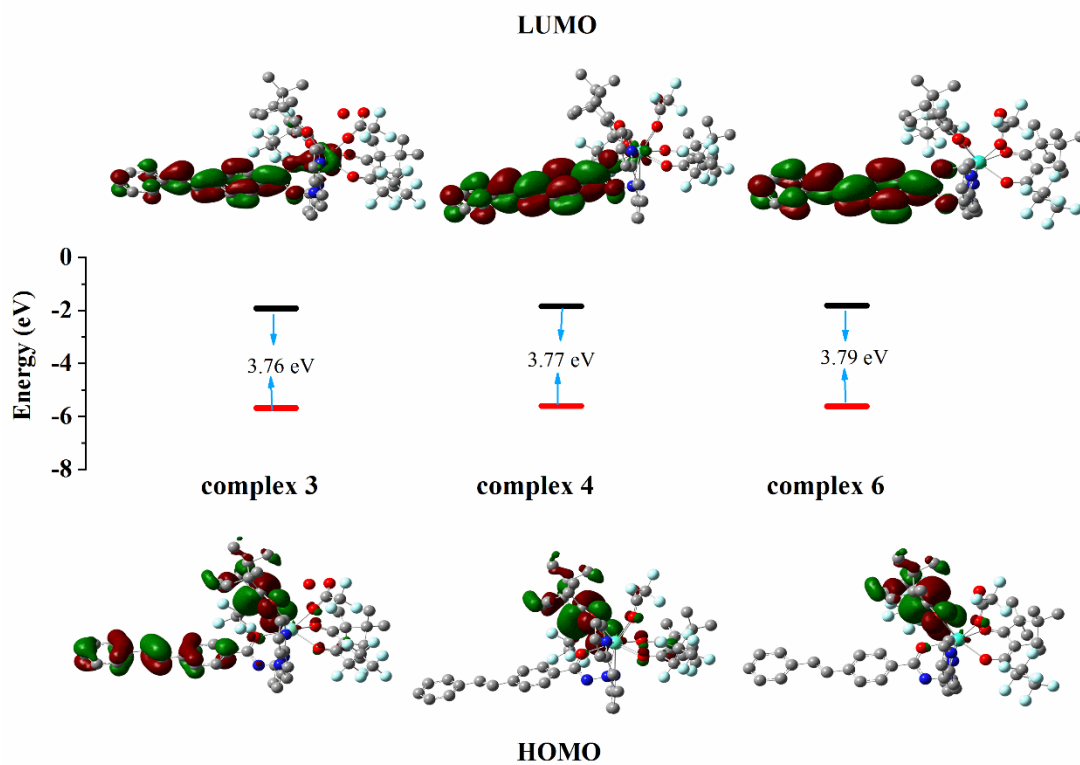

**Figure S15. HOMO and LUMO energy levels and orbital distributions of complexes 3, 4 and 6.**

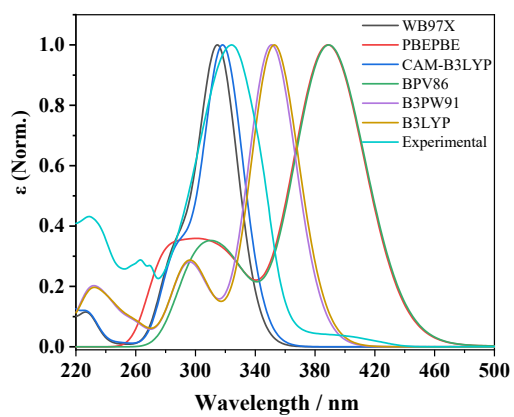

**Figure S16. Overlay of calculated and experimental absorption spectra of the complex 1 in acetonitrile solutions.**

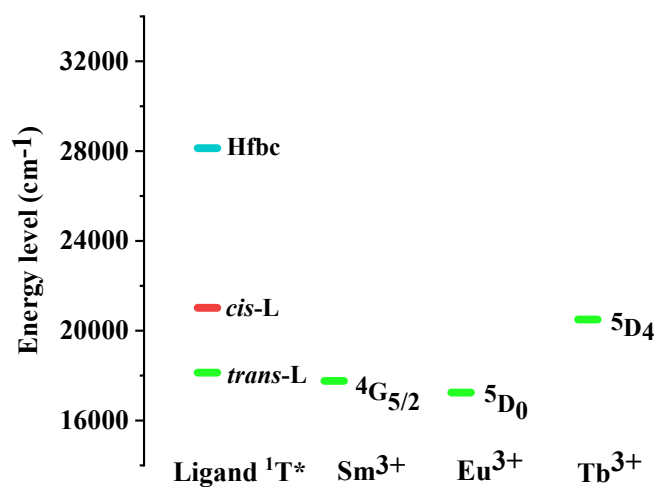

Figure S17. The energy levels of the first excited states of ligands *trans*-L, *cis*-L, Hfbc and the related energy levels of the Sm<sup>3+</sup>, Eu<sup>3+</sup> and Tb<sup>3+</sup>.

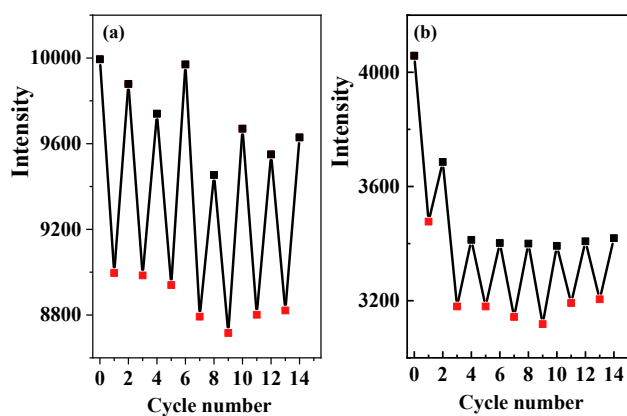

Figure S18. Cycles of maximum luminescence intensity at 420 nm are modulated by the irradiation of UV light at 365 nm for 2 min and 254 nm for 2 min, alternatively (a for complex 3, b for complex 4).
